# Supplementary material
Source: PubMed Central journal article supplement (PMC6545268)
Supplement: NIHMS1509659-supplement-1.pdf [file NIHMS1509659-supplement-1.pdf]

### Supplement A. Local false discovery rate (locfdr) in one dimension

A local false discovery rate (locfdr) is defined from a mixture of distributions. Suppose that we have  $k$  tests each with p-value  $p_i$ , for  $i = 1, 2, \dots, k$ . Let  $z$  be the test statistic of interest (pathways in the manuscript). Each case (or test) can be considered from either null (H0) or alternative (H1) with the prior probabilities of

$$p_0 = \text{probability}(H0) \text{ and } p_1 = \text{probability}(H1) = 1 - p_0.$$

Then,  $z$  values have the following mixture density

$$f(z) = p_0 f_0(z) + p_1 f_1(z),$$

where  $f_0(z)$  and  $f_1(z)$  are the null and alternative densities, respectively.

Then, the locfdr is defined as  $\text{locfdr}(z) = \text{probability}\{H0 \mid Z=z\}$ , where  $Z$  is a test statistic. Under the mixture model above, it is straightforward to show (S1, S2)

$$\text{locfdr}(z) = p_0 f_0(z) / f(z).$$

There can be several different choices of  $f_0$  and  $f_1$ , and ways to estimate them. In our approach,  $f_0$  is a normal distribution and  $f_1$  is a log-concave density function. Then, we estimate  $p_0$ ,  $f_0$  and  $f_1$  by the EM algorithm that is most widely used to estimate a mixture density.

The above is the description of one-dimensional case and the technical report (S1) presents the extension to multi-dimensional cases and simulation studies to show how well our approach can estimate locfdr under various settings and performs better than other existing methods.

#### References:

- S1. Jeong S-O, Choi, D., Jang, W. A semiparametric mixture method for local false discovery rate estimation. Arxiv.org 2016; Available from: <http://arxiv.org/abs/1604.04264>.
- s2. Efron B. Microarrays, empirical bayes and the two-groups model. Statist Sci 2008;23:1-22.

| <b>Table S1: Individual genes associated with AAV pathways</b> |                                                                                                                                                         |                                                                                                                                                                                                                                                                                                                                  |                                                                                                                                         |                        |
|----------------------------------------------------------------|---------------------------------------------------------------------------------------------------------------------------------------------------------|----------------------------------------------------------------------------------------------------------------------------------------------------------------------------------------------------------------------------------------------------------------------------------------------------------------------------------|-----------------------------------------------------------------------------------------------------------------------------------------|------------------------|
| <b>Pathway</b>                                                 | <b>Peripheral leukocyte genes</b>                                                                                                                       | <b>Nasal sinus brushing genes</b>                                                                                                                                                                                                                                                                                                | <b>Orbital tissue genes</b>                                                                                                             | <b>md-locfdr*</b>      |
| <b>Innate Immunity</b>                                         |                                                                                                                                                         |                                                                                                                                                                                                                                                                                                                                  |                                                                                                                                         |                        |
| Neutrophil degranulation(R)                                    | <i>SLC11A1,SLPI,RAB5C,S100A12,DEFA4,VNN1,TCN1,LCN2,TNFAIP6,PYGL,HK3,CAMP,SERPINB1,ARG1,NFAM1,MMP9,CKAP4,CEACAM8,LTF,TLR2,CD59,MAPK14,LRG1,QPCT,PTX3</i> | <i>GMFG,C3AR1,SLC11A1,FPR1,FPR2,S100A12,CD14,SIGLEC9,SERPINA1,HBB,MMP25,TIMP2,OLR1,CD53,FCER1G,MME,TLR2,CXCR1,ALOX5,CXCR2,LILRB2,LILRB3,QPCT,SIGLEC5,PLAU,COTL1,CD93,CD300A,CLEC4D,TYROBP,DAM8,S100A9,S100A8,C5AR1,HSPA6,PTPRC,SELL,ITGAM,TNFAIP6,ITGB2,LRMP,FCAR,ITGAX,CR1,PLAUR,TNFRSF1B,MMP9,FGR,CHI3L1,DOCK2,FCGR2A,MNDA</i> | <i>FCN1,CLEC5A,SLC11A1,CLEC4D,DAM8,LYZ,ARHGAP9,SERPINA1,ITGB2,TCIRG1,SLC2A5,ITGAL,SIRPB1,ITGAX,KCNAB2,MMP9,CHI3L1,TLR2,LILRA3,ALOX5</i> | 1.05x10 <sup>-12</sup> |
|                                                                | p=3.14x10 <sup>-13</sup>                                                                                                                                | p= 1.11x10 <sup>-16</sup>                                                                                                                                                                                                                                                                                                        | p=3.28x10 <sup>-09</sup>                                                                                                                |                        |
| Antimicrobial peptides(R)                                      | <i>SLC11A1,DEFA4,LCN2,CAMP,LTF,TLR2</i>                                                                                                                 | <i>SLC11A1,TLR2,S100A9,S100A8,DEFA3</i>                                                                                                                                                                                                                                                                                          | <i>SLC11A1,LYZ,CCR2,TLR2</i>                                                                                                            | 8.23x10 <sup>-03</sup> |
|                                                                | p=7.69x10 <sup>-06</sup>                                                                                                                                | p=1.13x10 <sup>-03</sup>                                                                                                                                                                                                                                                                                                         | p=1.14x10 <sup>-03</sup>                                                                                                                |                        |
| Toll-Like Receptors Cascades(R)                                | <i>MEF2A,LY96,S100A12,PELI1,TLR10,TLR5,TLR2,MAPK3,MAPK14</i>                                                                                            | <i>S100A12,CD14,FOS,TLR8,TLR4,TLR2,S100A9,S100A8,ITGAM,ITGB2</i>                                                                                                                                                                                                                                                                 | <i>RPS6KA1,ITGB2,IKBKE,TLR8,TLR2,PTPN11</i>                                                                                             | 0.026                  |
|                                                                | p=1.85x10 <sup>-05</sup>                                                                                                                                | p=2.78x10 <sup>-04</sup>                                                                                                                                                                                                                                                                                                         | p=3.39x10 <sup>-03</sup>                                                                                                                |                        |
| Phagosome(K)                                                   | <i>RAB5C,TLR2</i>                                                                                                                                       | <i>CD14,OLR1,TLR4,TLR2,NCF2,NCF4,CORO1A,CLEC7A,ITGAM,ITGB2,</i>                                                                                                                                                                                                                                                                  | <i>COMP,CLEC7A,ITGB2,TCIRG1,TLR2</i>                                                                                                    | 3.17x10 <sup>-03</sup> |

|                                                   |                                                |                                                                              |                                                                  |                        |
|---------------------------------------------------|------------------------------------------------|------------------------------------------------------------------------------|------------------------------------------------------------------|------------------------|
|                                                   |                                                | <i>FCAR,FCGR3A,ITGA5,THBS1,FCGR2A,FCGR2B</i>                                 |                                                                  |                        |
|                                                   | p=0.477                                        | p=2.88x10 <sup>-08</sup>                                                     | p=0.021                                                          |                        |
| Interferon gamma signaling(R)                     | <i>SOCS3</i>                                   | <i>SOCS3</i>                                                                 | <i>CIITA,IRF8,PTPN1,PTPN11</i>                                   | 0.134                  |
|                                                   | p=0.533                                        | p=0.733                                                                      | p=6.9x10 <sup>-03</sup>                                          |                        |
| <b>Adaptive Immunity</b>                          |                                                |                                                                              |                                                                  |                        |
| Signaling by the B Cell Receptor (BCR)(R)         | <i>IRS2,MAPK3</i>                              | <i>PRKCB,EREG,HBEGF</i>                                                      | <i>IER3,ITPR1,DAPP1,IGHM,IGLC1,IGHD,IGKC,PTPN11</i>              | 0.022                  |
|                                                   | p=0.774                                        | p=0.867                                                                      | p=6.68x10 <sup>-03</sup>                                         |                        |
| <b>Vascular wall interactions</b>                 |                                                |                                                                              |                                                                  |                        |
| Cell surface interactions at the vascular wall(R) | <i>CEACAM8</i>                                 | <i>FN1,OLR1,FCER1G,SLC7A5,SELPLG,SELL,ITGAM,ITGB2,TREM1,THBD,ITGAX,ITGA5</i> | <i>CD84,SLC16A3,FN1,IGHM,ITGB2,ITGAL,ITGAX,IGLC1,IGKC,PTPN11</i> | 4.19x10 <sup>-04</sup> |
|                                                   | p=0.887                                        | p=4.49x10 <sup>-04</sup>                                                     | p=5.86x10 <sup>-05</sup>                                         |                        |
| amb2 Integrin signaling(N)                        | <i>MMP9</i>                                    | <i>HCK,SELPLG,PLAT,PLAU,ITGAM,ITGB2,MMP9</i>                                 | <i>ITGB2,MMP9</i>                                                | 0.086                  |
|                                                   | p=0.276                                        | p=1.90x10 <sup>-06</sup>                                                     | p=0.041                                                          |                        |
| Leukocyte transendothelial migration(K)           | <i>MMP9,MAPK14</i>                             | <i>PRKCB,PIK3R5,RAC2,CXCR4,NCF2,NCF4,ITGAM,ITGB2,MMP9</i>                    | <i>ITGB2,ITGAL,MMP9,CXCR4,PTPN11</i>                             | 0.178                  |
|                                                   | p=0.34                                         | p=2.94x10 <sup>-04</sup>                                                     | p=6.98x10 <sup>-03</sup>                                         |                        |
| <b>Cellular signaling</b>                         |                                                |                                                                              |                                                                  |                        |
| Signaling by Interleukins(R)                      | <i>IL1RN,IRS2,IL18RAP,IL1R1,IL1R2,CSF2RA,R</i> | <i>IL1RN,IL36A,JUNB,IL1R2,EREG,FPR1,FN1,IL3</i>                              | <i>IL1RN,IGHG1,FN1,IL7R,ITGB2,ITG</i>                            | 6.13x10 <sup>-04</sup> |

|                                           |                                                               |                                                                                                                              |                                                                        |                        |
|-------------------------------------------|---------------------------------------------------------------|------------------------------------------------------------------------------------------------------------------------------|------------------------------------------------------------------------|------------------------|
|                                           | <i>ASGRP4,SOCS3,LCN2,RASGEF1A,MMP9,PELI1,MAPK3,OSM,IL18R1</i> | <i>6G,FOS,IL1B,HBEGF,PTGS2,ALOX5,IL10RA,OSM,CSF3R,IL18RAP,CSF2RB,RASGRP4,SOCS3,ITGAM,ITGB2,ITGAX,TNFRSF1B,MMP9,CCL4,CCL3</i> | <i>AX,JAK3,CCR2,MMP9,IL17RA,CCL11,IL2RG,ALOX5,CCL19,IL12RB1,PTPN11</i> |                        |
|                                           | $p=8.91 \times 10^{-05}$                                      | $p=8.24 \times 10^{-08}$                                                                                                     | $p=1.88 \times 10^{-05}$                                               |                        |
| Cytokine-cytokine receptor interaction(K) | <i>CXCL16,IL18RAP,IL1R1,IL1R2,CSF2RA,FLT1,OSM,IL18R1</i>      | <i>IL1R2,IL1B,CXCR4,CXCR1,CXCR2,CCL18,CCL24,IL10RA,OSM,CSF3R,CXCL13,IL18RAP,CSF2RB,TNFRSF10C,TNFRSF1B,CCL4,CCL3</i>          | <i>IL7R,CCR2,IL17RA,LTB,CCL11,CXCR4,IL2RG,IL21R,CCL19,IL12RB1</i>      | 0.036                  |
|                                           | $p=6.66 \times 10^{-03}$                                      | $p=7.78 \times 10^{-06}$                                                                                                     | $p=4.08 \times 10^{-04}$                                               |                        |
| Chemokine signaling pathway(K)            | <i>CXCL16,WAS,MAPK3</i>                                       | <i>PREX1,PRKCB,PIK3R5,RAC2,HCK,CXCR4,CXCR1,CXCR2,CCL18,CCL24,CXCL13,FGR,DOCK2,CCL4,CCL3</i>                                  | <i>GRK6,JAK3,CCR2,CCL11,CXCR4,CCL19</i>                                | 0.041                  |
|                                           | $p=0.308$                                                     | $p=1.97 \times 10^{-06}$                                                                                                     | $p=0.013$                                                              |                        |
| IL4-mediated signaling events(N)          | <i>SPI1,IRS2,SOCS3,ARG1,MAPK14</i>                            | <i>SPI1,EGR2,SOCS3</i>                                                                                                       | <i>IGHG1,HMGA1,JAK3,CCL11,IL2RG</i>                                    | 0.021                  |
|                                           | $p=5.47 \times 10^{-04}$                                      | $p=0.107$                                                                                                                    | $p=5.04 \times 10^{-04}$                                               |                        |
| <b>Complement Activation</b>              |                                                               |                                                                                                                              |                                                                        |                        |
| Complement and coagulation cascades(K)    | <i>F5,CD59</i>                                                | <i>C3AR1,SERPINA1,PLAT,PLAU,C5AR1,ITGAM,ITGB2,THBD,ITGAX,CR1,PLAUR</i>                                                       | <i>SERPINA1,ITGB2,ITGAX</i>                                            | 0.044                  |
|                                           | $p=0.199$                                                     | $p=2.70 \times 10^{-07}$                                                                                                     | $p=0.048$                                                              |                        |
| <b>Tissue Damage/Tissue Repair</b>        |                                                               |                                                                                                                              |                                                                        |                        |
| Urokinase-type plasminogen                | <i>MMP9</i>                                                   | <i>FPR1,FPR2,FN1,PLAU,ITGAM,ITGB2,PLAUR,</i>                                                                                 | <i>FN1,ITGB2,MMP9</i>                                                  | $7.77 \times 10^{-03}$ |

|                                                              |                            |                                                                                     |                                                         |                        |
|--------------------------------------------------------------|----------------------------|-------------------------------------------------------------------------------------|---------------------------------------------------------|------------------------|
| activator (uPA) and uPAR-mediated signaling(N)               |                            | <i>MMP9,ITGA5</i>                                                                   |                                                         |                        |
|                                                              | p=0.354                    | p=9.81x10 <sup>-08</sup>                                                            | p=9.39x10 <sup>-03</sup>                                |                        |
| Extracellular matrix organization(R)                         | <i>COL9A2,MMP9,CEACAM8</i> | <i>SPARC,ICAM3,KLK7,FN1,TIMP2,SPP1,ADAM8,ITGAM,ITGB2,ITGAX,MMP9,ITGA5,THBS1,LUM</i> | <i>DMP1,COMP,ADAM8,FN1,ITGB2,ITGAL,ITGAX, MMP9,SPP1</i> | 0.024                  |
|                                                              | p=0.497                    | p=2.51x10 <sup>-04</sup>                                                            | p=1.27x10 <sup>-03</sup>                                |                        |
| <b>Platelet Activation</b>                                   |                            |                                                                                     |                                                         |                        |
| Response to elevated platelet cytosolic Ca <sup>2+</sup> (R) | <i>F5</i>                  | <i>SPARC,PRKCB,CD109,FN1,FERMT3,ECM1,SERPINA1,FLNA,PLEK,SRGN,THBS1</i>              | <i>STXBP2,FN1,SERPINA1</i>                              | 0.038                  |
|                                                              | p=0.670                    | p=4.50x10 <sup>-06</sup>                                                            | p=0.095                                                 |                        |
| GPVI-mediated activation cascade(R)                          | <i>CSF2RA</i>              | <i>PIK3R5,RAC2,FCER1G,CSF2RB,LCP2</i>                                               | <i>JAK3,IL2RG,PDPN,PTPN11</i>                           | 0.079                  |
|                                                              | p=0.400                    | p=2.1x10 <sup>-03</sup>                                                             | p=1.69x10 <sup>-03</sup>                                |                        |
| Platelet homeostasis(R)                                      | <i>SLC8A1,MRVI1,MAPK14</i> | <i>FGR</i>                                                                          | <i>SLC8A1,ITPR1,ATP2A3,PTPN11</i>                       | 0.091                  |
|                                                              | p=0.024                    | p=0.656                                                                             | p=3.28x10 <sup>-03</sup>                                |                        |
| <b>Infectious Disease Pathways</b>                           |                            |                                                                                     |                                                         |                        |
| Leishmaniasis(K)                                             | <i>TLR2,MAPK3,MAPK14</i>   | <i>PRKCB,FOS,IL1B,TLR4,TLR2,PTGS2,NCF2,NCF4,ITGAM,ITGB2,FCGR3A,CR1,FCGR2A</i>       | <i>ITGB2,TLR2</i>                                       | 3.54x10 <sup>-03</sup> |
|                                                              | p=0.041                    | p=1.22x10 <sup>-09</sup>                                                            | p=0.172                                                 |                        |
| Malaria(K)                                                   | <i>TLR2</i>                | <i>HBB,HBA1,IL1B,TLR4,TLR2,ITGB2,CR1,THBS1</i>                                      | <i>COMP,ITGB2,ITGAL,TLR2</i>                            | 0.012                  |
|                                                              | p=0.400                    | p=3.77x10 <sup>-06</sup>                                                            | p=1.69x10 <sup>-03</sup>                                |                        |
| Tuberculosis(K)                                              | <i>RAB5C,CAMP,TLR2,M</i>   | <i>CD14,PLK3,FCER1G,IL</i>                                                          | <i>CLEC7A,VDR,CIIT</i>                                  | 0.019                  |

|                                                                                                        |                                             |                                                                                                                           |                                            |                        |
|--------------------------------------------------------------------------------------------------------|---------------------------------------------|---------------------------------------------------------------------------------------------------------------------------|--------------------------------------------|------------------------|
|                                                                                                        | <i>APK3,MAPK14</i>                          | <i>1B,TLR4,TLR2,IL10RA,CLEC4E,CORO1A,CLEC7A,ITGAM,ITGB2,FCGR3A,ITGAX,CR1,FCGR2A,FCGR2B</i>                                | <i>A,ITGB2,TCIRG1,ITGAX,TLR2</i>           |                        |
|                                                                                                        | p=0.040                                     | p=3.79x10 <sup>-08</sup>                                                                                                  | p=2.52x10 <sup>-03</sup>                   |                        |
| Measles(K)                                                                                             | <i>TLR2</i>                                 | <i>PIK3R5,IL1B,TLR4,TLR2,HSPA6,TNFRSF10C,FCGR2B</i>                                                                       | <i>SLAMF1,SH2D1A,JAK3,IKBKE,TLR2,IL2RG</i> | 0.035                  |
|                                                                                                        | p=0.759                                     | p=0.012                                                                                                                   | p=2.84x10 <sup>-03</sup>                   |                        |
| Amoebiasis(K)                                                                                          | <i>IL1R1,IL1R2,RAB5C,SERPINB1,ARG1,TLR2</i> | <i>PRKCB,IL1R2,PIK3R5,CD14,FN1,IL1B,TLR4,TLR2,ITGAM,ITGB2</i>                                                             | <i>FN1,ITGB2,TLR2</i>                      | 0.142                  |
|                                                                                                        | p=5.97x10 <sup>-04</sup>                    | p=1.42x10 <sup>-05</sup>                                                                                                  | p=0.080                                    |                        |
| <b>Other</b>                                                                                           |                                             |                                                                                                                           |                                            |                        |
| Osteoclast differentiation(K)                                                                          | <i>SPI1,IL1R1,SOCS3,MAPK3,MAPK14</i>        | <i>SPI1,JUNB,PIK3R5,FOS,IL1B,LILRA1,LILRA2,LILRA5,LILRB2,LILRB3,FOSB,NCF2,NCF4,TYROBP,SOCS3,FCGR3A,LCP2,FCGR2A,FCGR2B</i> | <i>SIRPB1,LILRA3*</i>                      | 3.75x10 <sup>-05</sup> |
|                                                                                                        | p=0.013                                     | p=6.19x10 <sup>-12</sup>                                                                                                  | p=0.391                                    |                        |
| Inflammatory bowel disease (IBD)(K)                                                                    | <i>IL18RAP,TLR5,TLR2,IL18R1</i>             | <i>IL1B,TLR4,TLR2,IL18RAP</i>                                                                                             | <i>FOXP3,TLR2,IL2RG,IL21R,IL12RB1</i>      | 0.093                  |
|                                                                                                        | p=4.91x10 <sup>-03</sup>                    | p=0.031                                                                                                                   | p=5.8x10 <sup>-04</sup>                    |                        |
| Transport of glucose and other sugars, bile salts and organic acids, metal ions and amine compounds(R) | <i>SLC11A1,SLC22A4,SLC40A1,SLC18A2</i>      | <i>SLC11A1</i>                                                                                                            | <i>SLC16A3,SLC11A1,SLC2A5</i>              | 0.124                  |
|                                                                                                        | p=1.12x10 <sup>-03</sup>                    | p=0.540                                                                                                                   | p=0.01                                     |                        |
| Syndecan-4-                                                                                            | <i>MMP9</i>                                 | <i>FN1,CXCR4,MMP9,ITG</i>                                                                                                 | <i>FN1,MMP9,CXCR</i>                       | 0.155                  |

|                                                                                                                                                                                                                                                                                                     |           |                                             |                              |  |
|-----------------------------------------------------------------------------------------------------------------------------------------------------------------------------------------------------------------------------------------------------------------------------------------------------|-----------|---------------------------------------------|------------------------------|--|
| mediated signaling events(N)                                                                                                                                                                                                                                                                        | $p=0.283$ | <i>A5, THBS1</i><br>$p=3.18 \times 10^{-4}$ | 4<br>$p=4.47 \times 10^{-3}$ |  |
| <p>*md-localFDR = multi-dimensional local false discovery rate, which can be thought of as the probability of individual pathway being a false discovery in <i>all three</i> tissues.</p> <p>C = CellMap, R = Reactome, K = Kyoto Encyclopedia of Genes and Genomes (KEGG), N = National Cancer</p> |           |                                             |                              |  |

| <b>Table S2: Downregulated pathways associated with two out of three tissues</b>                                                                              |                                                                                                                                               |                                                                                                                      |
|---------------------------------------------------------------------------------------------------------------------------------------------------------------|-----------------------------------------------------------------------------------------------------------------------------------------------|----------------------------------------------------------------------------------------------------------------------|
| <b>Orbit and nasal sinus brushings</b>                                                                                                                        | <b>Orbit and leukocytes</b>                                                                                                                   | <b>Nasal sinus brushings and leukocytes</b>                                                                          |
| Metabolism of xenobiotics by cytochrome P450(K)<br>Orbit $p=2.40 \times 10^{-3}$ , FDR=0.077<br>Nasal $p=2.00 \times 10^{-4}$ ,<br>FDR= $5.20 \times 10^{-3}$ | Cytokine-cytokine receptor interaction(K)<br>Orbit $p=0.069$ , FDR=0.162<br>Leukocyte $p=3.05 \times 10^{-4}$ ,<br>FDR= $8.53 \times 10^{-3}$ | IL12-mediated signaling events(N)<br>Nasal $p=0.091$ , FDR=0.113<br>Leukocyte $p=8.68 \times 10^{-3}$ ,<br>FDR=0.069 |
| Drug metabolism - cytochrome P450(K)<br>Orbit $p=0.026$ , FDR=0.162<br>Nasal $p=1.70 \times 10^{-4}$ ,<br>FDR= $5.20 \times 10^{-3}$                          | Response to elevated platelet cytosolic Ca <sup>2+</sup> (R)<br>Orbit $p=6.53 \times 10^{-3}$ , FDR=0.127<br>Leukocyte $p=0.217$ , FDR=0.217  | NOD-like receptor signaling pathway(K)<br>Nasal $p=0.235$ , FDR=0.235<br>Leukocyte $p=0.058$ , FDR=0.117             |
| Tyrosine metabolism(K)<br>Orbit $p=7.10 \times 10^{-3}$ , FDR=0.127<br>Nasal $p=0.053$ , FDR=0.113                                                            | Caspase cascade in apoptosis(N)<br>Orbit $p=0.171$ , FDR=0.171<br>Leukocyte $p=6.38 \times 10^{-3}$ ,<br>FDR=0.060                            | Chagas disease (American trypanosomiasis)(K)<br>Nasal $p=0.011$ , FDR=0.091<br>Leukocyte $p=0.214$ , FDR=0.214       |
| Retinol metabolism(K)<br>Orbit $p=0.209$ , FDR=0.209<br>Nasal $p=1.37 \times 10^{-4}$ ,<br>FDR= $5.20 \times 10^{-3}$                                         | Malaria(K)<br>Orbit $p=0.162$ , FDR=0.162<br>Leukocyte $p=0.107$ , FDR=0.117                                                                  | Pathways in cancer(K)<br>Nasal $p=0.126$ , FDR=0.126<br>Leukocyte $p=0.062$ , FDR=0.117                              |
| Chemical carcinogenesis(K)<br>Orbit $p=0.035$ , FDR=0.162<br>Nasal $p=2.70 \times 10^{-4}$ ,<br>FDR= $5.67 \times 10^{-3}$                                    | Signaling events mediated by PTP1B(N)<br>Orbit $p=0.015$ , FDR=0.162<br>Leukocyte $p=0.113$ , FDR=0.117                                       | Signaling by Interleukins(R)<br>Nasal $p=0.160$ , FDR=0.160<br>Leukocyte $p=0.087$ , FDR=0.117                       |

|                                                                                                                                                                    |                                                                                                 |                                                                                                     |
|--------------------------------------------------------------------------------------------------------------------------------------------------------------------|-------------------------------------------------------------------------------------------------|-----------------------------------------------------------------------------------------------------|
| Steroid hormone biosynthesis(K)<br>Orbit p=0.188, FDR=0.188<br>Nasal p=3.67x10 <sup>-03</sup> , FDR=0.029                                                          | Adherens junction(K)<br>Orbit p=0.228, FDR=0.228<br>Leukocyte p=0.153, FDR=0.153                | Cytosolic DNA-sensing pathway(K)<br>Nasal p=0.096, FDR=0.113<br>Leukocyte p=0.137, FDR=0.137        |
| Fatty acid degradation(K)<br>Orbit p=0.146, FDR=0.162<br>Nasal p=0.067, FDR=0.113                                                                                  | Viral myocarditis(K)<br>Orbit p=0.191, FDR=0.191<br>Leukocyte p=0.127, FDR=0.127                | Circadian entrainment(K)<br>Nasal p=0.14, FDR=0.14<br>Leukocyte p=0.199, FDR=0.199                  |
| AP-1 transcription factor network(N)<br>Orbit p=0.223, FDR=0.223<br>Nasal p=0.104, FDR=0.113                                                                       | Integration of energy metabolism(R)<br>Orbit p=0.043, FDR=0.162<br>Leukocyte p=0.192, FDR=0.192 | Melanogenesis(K)<br>Nasal p=0.147, FDR=0.147<br>Leukocyte p=0.208, FDR=0.208                        |
| Phase 1 - Functionalization of compounds(R)<br>Orbit p=0.031, FDR=0.162<br>Nasal p=0.113, FDR=0.113                                                                |                                                                                                 | Retrograde endocannabinoid signaling(K)<br>Nasal p=0.147, FDR=0.147<br>Leukocyte p=0.208, FDR=0.208 |
| Glycolysis / Gluconeogenesis(K)<br>Orbit p=0.214, FDR=0.214<br>Nasal p=0.010, FDR=0.113                                                                            |                                                                                                 | Cholinergic synapse(K)<br>Nasal p=0.160, FDR=0.160<br>Leukocyte p=0.226, FDR=0.226                  |
| Signaling by Retinoic Acid(R)<br>Orbit p=0.115, FDR=0.162<br>Nasal p=0.052, FDR=0.113                                                                              |                                                                                                 | Serotonergic synapse(K)<br>Nasal p=0.163, FDR=0.163<br>Leukocyte p=0.23, FDR=0.23                   |
| Long-term potentiation(K)<br>Orbit p=0.214, FDR=0.214<br>Nasal p=0.010, FDR=0.113                                                                                  |                                                                                                 | Glutamatergic synapse(K)<br>Nasal p=0.164, FDR=0.164<br>Leukocyte p=0.232, FDR=0.232                |
|                                                                                                                                                                    |                                                                                                 | Sphingolipid signaling pathway(K)<br>Nasal p=0.172, FDR=0.172<br>Leukocyte p=0.242, FDR=0.242       |
| R = Reactome, K = Kyoto Encyclopedia of Genes and Genomes (KEGG), N = National Cancer Institute Pathway Interaction Database (NCI PID), FDR = false discovery rate |                                                                                                 |                                                                                                     |
